# Supplementary material for: LncRNA HOTAIR Enhances Epithelial-to-mesenchymal Transition to Promote the Migration and Invasion of Liver Cancer by Regulating NUAK1 via Epigenetic Inhibition miR-145-5p Expression
Source: PubMed Central journal article supplement (PMC10414040; doi:10.7150/jca.85335), 2023-07-24
Supplement: jcav14p2329s1.pdf [file jcav14p2329s1.pdf]

| Sample number | Gender | Age(year) | Disease Subtypes | Edmondson Grade | Tumor Size(cm) | Pathomorphological Classification | Vascular Invasion | HBsAg | Cirrhosis |
|---------------|--------|-----------|------------------|-----------------|----------------|-----------------------------------|-------------------|-------|-----------|
| 1             | F      | 50        | +                | I               | 10×6×5         | Nodular                           | -                 | -     | -         |
| 2             | M      | 56        | +                | II              | 3×3×4.5        | Multinodular                      | -                 | -     | -         |
| 3             | M      | 54        | +                | II              | 5×6×5.5        | Nodular                           | -                 | -     | -         |
| 4             | M      | 61        | +                | II              | 3×5×2          | Nodular                           | -                 | +     | +         |
| 5             | M      | 41        | +                | II              | 2×3×3          | Infiltrating                      | +                 | -     | -         |
| 6             | F      | 53        | +                | II              | 4×4×5          | Multinodular                      | -                 | +     | +         |
| 7             | M      | 23        | +                | II              | 9×4.5×6        | Nodular                           | +                 | -     | -         |
| 8             | M      | 70        | +                | II              | 6×5×7          | Infiltrating                      | +                 | -     | -         |
| 9             | F      | 62        | +                | II              | 7×4.5×6        | Multiple Fusion                   | -                 | -     | -         |
| 10            | M      | 42        | +                | II              | 5×4×4          | Infiltrating                      | +                 | -     | -         |
| 11            | M      | 64        | +                | II-III          | 2×1.5×3        | Nodular                           | +                 | +     | +         |
| 12            | M      | 62        | +                | II-III          | 4×3×3          | Infiltrating                      | -                 | -     | -         |
| 13            | M      | 42        | +                | II-III          | 13.2×10×7      | Infiltrating                      | +                 | +     | +         |
| 14            | F      | 64        | +                | II-III          | 8.6×7×5        | Multinodular                      | +                 | +     | +         |
| 15            | F      | 62        | +                | II-III          | 5×4×4          | Infiltrating                      | -                 | +     | +         |
| 16            | F      | 47        | +                | II-III          | 5×4×4.5        | Thin Beam Type                    | +                 | +     | +         |
| 17            | M      | 51        | +                | II-III          | 7×5×6.5        | Nodular                           | +                 | -     | -         |
| 18            | M      | 59        | +                | II-III          | 7×7×6          | Multinodular                      | -                 | +     | +         |
| 19            | F      | 41        | +                | II-III          | 7×5×5.5        | Multiple Fusion                   | +                 | +     | +         |
| 20            | M      | 68        | +                | II-III          | 4.5×4.5×4      | Infiltrating                      | -                 | -     | -         |
| 21            | F      | 62        | +                | II-III          | 4×3×3          | Thin Beam Type                    | +                 | -     | -         |
| 22            | F      | 53        | +                | II-III          | 10×8×7.5       | Nodular                           | -                 | +     | +         |
| 23            | M      | 69        | +                | II-III          | 7×5.5×6        | Multinodular                      | +                 | -     | -         |
| 24            | F      | 59        | +                | II-III          | 6×5.5×7        | Thin Beam Type                    | +                 | -     | -         |
| 25            | F      | 60        | +                | II-III          | 6×4.5×5.5      | Nodular                           | +                 | +     | +         |
| 26            | M      | 53        | +                | II-III          | 2.5×4.5×3      | Infiltrating                      | -                 | -     | -         |
| 27            | F      | 65        | +                | II-III          | 12×13×6.5      | Nodular                           | -                 | +     | +         |
| 28            | F      | 55        | +                | III             | 5.5×3×3        | Infiltrating                      | -                 | -     | -         |
| 29            | M      | 66        | +                | III             | 7.1×5×6        | Multiple Fusion                   | -                 | +     | +         |
| 30            | F      | 73        | +                | IV              | 8×5.5×6        | Nodular                           | +                 | -     | -         |

**Supplementary table**

**M, male; F, female; Disease Subtypes: All subtypes in this item are HCC. In order to make the table more concise, we use "+" to represent HCC; HBsAg, hepatitis B surface antigen.**

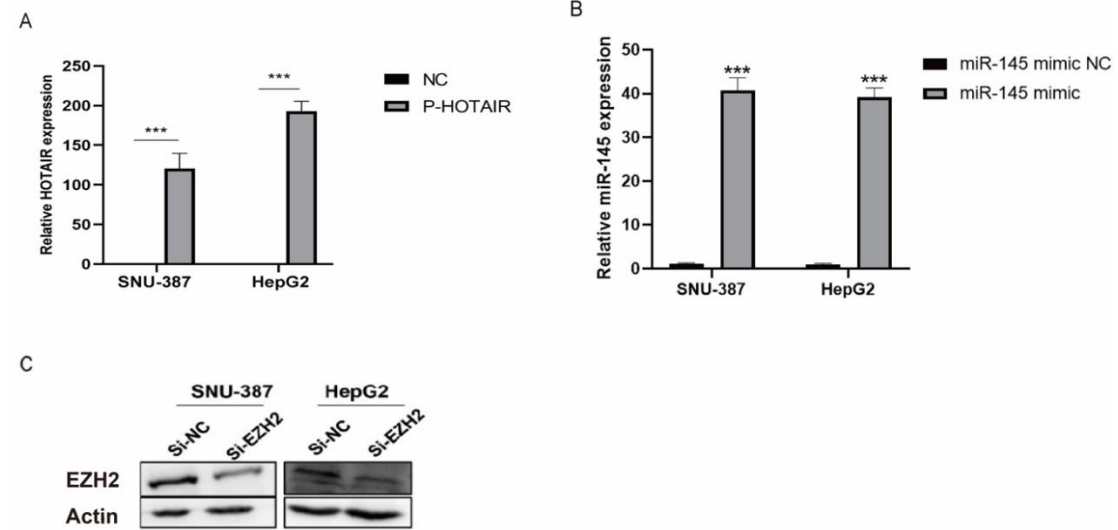

### Supplementary Figure

(A) Transfected LZRS-HOTAIR plasmids in SNU-387 and HepG2, and detected the expression level of HOTAIR by qPCR. (B) Transfected miR-145 mimic in SNU-387 and HepG2, and detected the expression level of miR-145-5p by qPCR. (C) Transfected Si-EZH2 in SNU-387 and HepG2, and detected the protein expression level of EZH2 by Western blot. Bars, SD (n=3), \*p<0.05, \*\*p<0.01, and \*\*\*p<0.001 vs NC group.
